# Supplementary material for: The novel T755C mutation in &lt;i&gt;BMP15&lt;/i&gt; is associated with the litter size of Iranian Afshari, Ghezel, and Shal breeds
Source: Copernicus journal article supplement (doi:10.5194/aab-61-153-2018), 2018-03-28
Supplement: Supplementary file 1 [file aab-61-153-2018-supplement.zip]

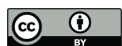

## *Supplement of*

# **The novel T755C mutation in *BMP15* is associated with the litter size of Iranian Afshari, Ghezel, and Shal breeds**

**Hamid-Reza Amini et al.**

*Correspondence to:* Shahin Eghbalsaied ([shahin.eghbal@khuisf.ac.ir](mailto:shahin.eghbal@khuisf.ac.ir))

- aab-61-153-2018-supplement-title-page.pdf
- CC.PNG
- CT.PNG
- Litter size data.xls
- Number 151, Hetrozigious TC, base 377.ab1
- Number 249, Homozigious TT- base 377.ab1
- Number A23, Homozigious CC- base 376.ab1
- Number D01, Hetrozigious TC, base 374.ab1
- TT.PNG

The copyright of individual parts of the supplement might differ from the CC BY 4.0 License.
